# Supplementary material for: Prefrontal activation while listening to a letter of gratitude read aloud by a coworker face-to-face: A NIRS study
Source: PLoS One. 2020 Sep 8;15(9):e0238715. doi: 10.1371/journal.pone.0238715 (PMC7478838; doi:10.1371/journal.pone.0238715)
Supplement: S1 Data — (XLSX) [file pone.0238715.s001.xlsx]

## Sheet: Anonymized Data Set
ID	Ahb	CBb	Ddb	Fib	Tab	Vab	TMDb	Fb	Aha	Cba	Dda	Fia	Taa	Vaa	TMDa	Fa	rAVa01o	rAVa01d	rAVa01t	rAVa02o	rAVa02d	rAVa02t	rAVa03o	rAVa03d	rAVa03t	rAVa04o	rAVa04d	rAVa04t	rAVa05o	rAVa05d	rAVa05t	rAVa06o	rAVa06d	rAVa06t	rAVa07o	rAVa07d	rAVa07t	rAVa08o	rAVa08d	rAVa08t	rAVa09o	rAVa09d	rAVa09t	rAVa10o	rAVa10d	rAVa10t	rAVa11o	rAVa11d	rAVa11t
1	3	9	4	8	10	11	23	12	1	7	2	5	7	11	11	12	0.0065007	-0.00524105	0.00125967	0.00620209	-0.00330216	0.00289994	-0.00557025	-0.000673567	-0.00624382	0.0061968	-0.000903803	0.00529299	0.00495327	-0.00386336	0.00108992	0.0051538	-0.00352098	0.00163281	0.00417944	-0.00529144	-0.00111202	0.0130623	0.00268891	0.0157512	0.0201363	-0.00197239	0.018164	0.00232242	-0.00152022	0.000802178	0.000663443	-0.00452803	-0.00386457
2	0	1	0	2	2	10	-5	10	0	0	0	1	1	10	-8	10	0.00370632	0.00380311	0.00750941	-0.00376189	0.00307153	-0.00069033	-0.00856168	0.000257882	-0.00830378	-0.00845004	-0.00158057	-0.0100306	-0.0107521	-0.00202784	-0.0127799	-0.0137645	0.00147498	-0.0122895	-0.00647714	0.00788729	0.00141011	0.00678154	-0.000845871	0.00593567	-0.00224097	0.00682511	0.00458412	-0.00994566	0.000608884	-0.00933678	-0.0139498	0.00162816	-0.0123217
3	12	8	5	7	10	9	33	10	11	10	6	8	6	10	31	13	-0.0082561	0.00416161	-0.00409448	-0.00840026	-0.00134987	-0.00975011	-0.00966328	8.27148e-05	-0.00958051	-0.00419848	0.00379924	-0.000399248	-0.00474489	0.0040903	-0.000654608	-0.00365722	0.00317647	-0.00048073	-0.00473175	-0.000797876	-0.0055296	-0.00741936	-0.00160387	-0.00902323	-0.00504861	0.00284511	-0.00220353	-0.0107106	-0.00126281	-0.0119734	-0.0126187	0.00408563	-0.0085331
4	2	8	3	3	5	9	12	11	1	8	4	3	6	10	12	12	-0.0035182	0.00937359	0.00585539	-0.011634	0.0075803	-0.00405375	-0.0105124	0.00977837	-0.000734066	-0.00167179	0.00871382	0.00704204	-0.0064635	0.00774286	0.00127935	-0.00709723	0.00459568	-0.00250155	-0.00473363	0.00577651	0.00104289	-0.00999819	0.00427967	-0.00571847	-0.0188774	0.00379735	-0.0150801	-0.0181492	0.00392358	-0.0142256	-0.0179262	0.000827371	-0.0170989
5	2	6	4	5	11	5	23	10	0	1	2	1	4	6	2	10	0.00529416	-0.000325039	0.00496915	-0.00622802	0.00822335	0.00199535	-0.0187094	0.00756344	-0.011146	-0.0108462	0.0027226	-0.00812365	-0.0125116	0.000852507	-0.0116591	-0.0125501	0.00848824	-0.00406184	-0.0121277	0.0131078	0.000980116	0.00451363	-0.0162117	-0.011698	0.000836726	0.00324931	0.00408606	-0.0139426	0.0148356	0.000892985	-0.00588097	0.00379638	-0.00208463
6	12	9	6	10	9	9	37	14	9	6	5	5	5	9	21	15	-0.00693482	-0.00731001	-0.0142448	-0.00169497	-0.000341523	-0.00203647	-0.00290454	-0.004782	-0.00768652	-0.00265907	-0.00185177	-0.00451085	-0.00625754	-0.00302868	-0.00928626	0.0011697	0.00197639	0.00314613	0.00920015	-0.000184407	0.00901576	0.0222664	-0.00200224	0.0202641	-0.00372461	-0.00153088	-0.00525544	-0.010344	-0.00596023	-0.0163042	-0.0133768	-0.00145641	-0.0148332
7	0	5	3	4	5	8	9	10	0	1	0	3	0	9	-5	10	0.00534052	0.00317692	0.0085175	-0.00146688	0.00457501	0.00310811	-0.00468498	0.00178155	-0.00290342	-0.00542858	0.00425991	-0.00116867	-0.00313538	0.00461409	0.00147866	0.0032071	-0.00107632	0.00213076	0.00709347	-0.00607158	0.00102186	0.00787241	-0.000421205	0.00745123	0.00281123	-0.00222822	0.000583041	-0.011261	0.00467511	-0.00658586	0.00165401	-0.00611756	-0.00446355
8	0	6	3	6	6	8	13	17	0	2	1	3	1	16	-9	19	0.010408	0.00186405	0.0122721	0.00756769	-0.000292381	0.00727533	0.00729315	0.000779722	0.00807289	0.00364838	-0.00143172	0.0022167	0.00131527	0.00114203	0.00245731	0.0089888	0.00117049	0.0101593	0.0119732	-0.00367203	0.00830119	0.0126062	0.00340193	0.0160081	0.00905524	0.000881557	0.00993677	0.00761762	-4.04315e-06	0.0076136	0.0103399	-0.00116094	0.00917899
9	0	2	0	3	1	13	-7	13	0	4	0	8	5	4	13	8	-0.00735816	0.0026595	-0.00469865	-0.0116363	-0.00662947	-0.0182658	-0.0046757	-0.000227537	-0.00490327	2.95e-06	2.11069e-06	5.06942e-06	-0.000354358	0.000887535	0.000533214	0.00376309	-0.0023284	0.00143469	0.00402723	-0.00485283	-0.000825623	-0.0132906	0.000652801	-0.0126378	-0.00787209	-0.00183601	-0.00970809	-0.0114796	0.000430278	-0.0110494	-0.00487744	0.00325326	-0.00162417
10	0	1	1	2	1	5	0	4	0	1	0	3	2	6	0	10	0.0150795	-0.00211761	0.0129619	-0.00881726	0.00197859	-0.00683865	-0.01559	-0.000131272	-0.0157212	-0.00668771	-8.00863e-05	-0.00676778	-0.0109712	0.00128262	-0.00968854	-0.00817603	-0.000929779	-0.0091058	0.00864208	-0.0059989	0.00264319	0.028649	-0.00935924	0.0192898	0.0119879	-0.00550256	0.00648534	-0.0210054	0.00254195	-0.0184635	-0.0190874	0.00014533	-0.0189421
11	1	2	2	8	7	6	14	11	0	0	2	7	2	6	5	10	-0.00300393	0.00539922	0.0023953	-0.00558405	0.00149594	-0.00408809	-0.00816283	0.00358958	-0.00457322	-2.196e-05	-1.56867e-05	-3.76604e-05	-0.0124923	0.00619292	-0.00629938	-0.00776421	0.00304867	-0.00471554	0.000612021	-0.00238562	-0.0017736	-0.00754538	0.00362879	-0.00391658	-0.00105998	-0.000675837	-0.00173585	-0.00686863	0.00316744	-0.00370121	-0.0191912	0.00752038	-0.0116708
12	0	5	2	1	5	11	2	9	0	1	0	1	3	14	-9	14	-0.000692353	-0.00604562	-0.00673796	-0.00449226	-0.00412761	-0.00861987	-0.00490714	0.00143403	-0.00347312	-3.22e-06	-2.29644e-06	-5.51782e-06	0.000585471	-4.32552e-05	0.000542257	0.00285265	-4.37111e-05	0.00280892	0.00265791	-0.000256595	0.0024013	0.00674091	-0.00651036	0.000230578	-0.000264051	-0.00076773	-0.0010318	-0.00583594	-0.000650355	-0.00648634	-0.00252509	-0.00145693	-0.00398203
13	7	8	1	5	6	6	21	9	4	9	0	2	9	5	19	7	0.00924691	-0.000505116	0.00874178	0.00404133	-0.00233025	0.00171107	0.0121659	-0.00897588	0.00319003	0.00879323	-0.00476874	0.0040245	0.0100827	-0.00311354	0.00696912	0.00277861	-0.00444822	-0.00166963	0.00942492	-0.00709666	0.00232824	0.000259578	-0.0152252	-0.0149656	0.00682897	-0.00756204	-0.000733079	-0.0131842	-0.000445762	-0.0136299	-0.00501058	-0.010535	-0.0155456
14	5	6	5	6	5	10	17	10	4	4	4	4	7	8	15	11	0.00168493	0.00056143	0.00224641	0.0025208	0.000529188	0.00304998	-0.000158818	0.00324318	0.00308436	6.274e-05	0.00337581	0.00343859	-0.0014094	0.00334939	0.00193999	-0.00057312	0.00064749	7.4379e-05	-0.0006976	-3.66735e-05	-0.000734255	-0.00685938	-0.0108198	-0.0176791	0.00305129	-0.000884484	0.00216683	-0.00538101	-0.00102659	-0.00640764	-0.00386377	0.00218941	-0.00167439
15	0	4	4	2	9	11	8	10	0	1	5	0	4	11	-1	13	-0.00583789	0.00288764	-0.00295025	-0.005012	0.0069346	0.00192257	0.00186802	0.00515604	0.00702403	0.00291562	0.00153974	0.00445537	0.00513475	-0.00142752	0.00370726	-0.00316297	0.00532288	0.00215988	0.00229765	-0.00391715	-0.00161951	-0.0119175	0.00472405	-0.00719342	-0.00758213	0.00295919	-0.00462291	-0.00661421	0.00926595	0.00265176	0.00228364	0.00766548	0.00994911
16	1	5	7	4	5	8	14	13	0	7	8	4	4	10	13	12	0.00083327	-0.001105	-0.000271719	0.000790477	-0.000141467	0.000649	-0.000522201	0.00198199	0.00145977	0.00274525	0.000278092	0.00302336	-0.00932461	-0.000625154	-0.00994973	-0.00340914	0.00352844	0.000119268	-0.00205229	0.00140498	-0.000647289	-0.00380154	-0.00842354	-0.0122251	-0.00231056	-0.00195495	-0.00426552	-0.00431573	0.00412278	-0.000192962	-0.00212181	0.000114844	-0.00200697
17	2	2	1	5	4	11	3	10	1	2	3	4	3	11	2	10	0.00592705	-0.00737634	-0.0014493	0.00175763	-0.00358592	-0.00182829	-0.00228249	-0.00523408	-0.00751657	0.0100446	-0.00603673	0.00400789	0.00588428	-0.0103836	-0.00449933	-3.84841e-05	-0.00434603	-0.00438448	0.00431701	-0.00397299	0.000344023	0.010319	-0.0077126	0.00260645	0.00218593	-0.00176576	0.000420158	-0.00481624	-0.00078854	-0.00560477	0.00375088	-0.00996014	-0.00620925
18	1	1	0	0	2	1	3	5	0	0	0	0	2	3	-1	12	0.00170179	0.00665257	0.00835436	0.0053512	0.0027475	0.00809869	0.000688317	0.0021564	0.00284471	-1.97749e-06	-1.41651e-06	-3.4015e-06	0.00111487	-0.000944332	0.000170542	0.00717698	-0.00307599	0.00410096	0.00764136	-0.0101232	-0.00248185	0.0281739	-0.0298307	-0.00165681	0.0026499	0.0060441	0.00869397	0.00214188	-0.00147492	0.000666968	-0.00290081	0.00100661	-0.00189419
19	0	7	8	1	7	15	8	17	0	4	3	0	4	20	-9	17	-0.00864603	-0.00361104	-0.012257	-0.00741944	-9.96435e-06	-0.00742938	-0.00431675	0.000203842	-0.0041129	-1.706e-05	-1.21914e-05	-2.92345e-05	-0.00669079	0.00311394	-0.00357685	-0.00327124	-0.000387386	-0.0036586	0.0151728	-0.0119897	0.00318307	0.00808832	-0.00172687	0.00636144	-0.000738227	-0.0016667	-0.0024049	-0.000530944	0.000772049	0.000241043	-0.00754417	0.00437657	-0.00316757
20	1	0	0	0	0	15	-14	16	1	0	0	0	0	15	-14	18	0.0102234	-0.00837639	0.00184699	-0.00302831	0.000873629	-0.00215466	-0.0132751	-0.000654724	-0.0139298	7.54878e-05	5.38949e-05	0.00012939	-0.0017587	0.000383343	-0.00137535	0.000529602	0.00227319	0.0028028	-0.00224583	-0.0117809	-0.0140267	0.0245012	0.000794467	0.0252957	0.0114943	-0.00133014	0.0101641	-0.00903123	0.000137606	-0.00889364	-0.0137688	-0.0038935	-0.0176623
[truncated: 363 more columns]
