# Supplementary material for: Prefrontal activation while listening to a letter of gratitude read aloud by a coworker face-to-face: A NIRS study
Source: PLoS One. 2020 Sep 8;15(9):e0238715. doi: 10.1371/journal.pone.0238715 (PMC7478838; doi:10.1371/journal.pone.0238715)
Supplement: S1 Table — df = (1, 19) was appreciable to each main effect (period or condition), and interaction (condition × period). aIn channel 4, n = 18 and df = (1, 17) was appreciable. ANOVA: analysis of variance; SE: standard error. (XLSX) [file pone.0238715.s002.xlsx]

## Sheet: S1
	S1 Table. Changes in oxy-Hb (×10-3) and results of the two-way repeated measures ANOVA in each channel (n = 20).
		Listening period				Baseline period				Main effect of period			Main effect of condition			Interaction (Period × Condition)
	NIRS-channels	Experimental condition		Control condition		Experimental condition		Control condition
		Mean	SE	Mean	SE	Mean	SE	Mean	SE	F	P-value	partial η2	F	P-value	partial η2	F	P-value	partial η2
	Ch 1	10.7824	4.70479	1.5285	2.54812	1.58495	1.56501	-0.539638	1.68044	3.021	0.098	0.137	4.323	0.051	0.185	3.461	0.078	0.154
	Ch 2	6.98739	3.52999	-1.42739	3.09509	-2.54722	1.29649	-6.85115	3.35368	6.497	0.02	0.255	3.883	0.064	0.17	1.339	0.262	0.066
	Ch 3	1.12844	4.01062	-3.18805	3.31975	-4.62411	1.64009	-5.6054	2.81157	1.268	0.274	0.063	0.927	0.348	0.047	1.15	0.297	0.057
	Ch 4a	7.48013	4.67825	1.80188	3.72531	-0.304829	1.3223	1.05018	1.39749	1.32	0.267	0.072	0.95	0.342	0.053	4.84	0.042	0.222
	Ch 5	7.85204	2.96614	2.00241	3.03784	-2.88979	1.471	-3.02866	2.30351	7.907	0.011	0.294	2.112	0.162	0.1	3.968	0.061	0.173
	Ch 6	5.5887	2.49741	-1.13167	2.33849	-1.3922	1.38845	-5.29507	2.28695	5.367	0.032	0.22	5.403	0.031	0.221	1.087	0.31	0.054
	Ch 7	11.0586	3.66325	1.96423	2.98435	2.70866	1.53238	0.251539	1.84416	2.483	0.132	0.116	5.853	0.026	0.236	3.059	0.096	0.139
	Ch 8	12.78	6.70633	-2.62593	3.31547	5.65012	2.96451	2.65709	2.85579	0.049	0.828	0.003	5.09	0.036	0.211	3.728	0.069	0.164
	Ch 9	11.5178	5.04492	-3.66651	3.48669	1.06596	1.88079	-4.69606	3.30106	3.036	0.098	0.138	8.209	0.01	0.302	4.258	0.053	0.183
	Ch 10	-5.3164	4.65788	-13.8658	4.04157	-7.56671	1.55477	-9.09952	3.52657	0.123	0.73	0.006	1.547	0.229	0.075	4.822	0.041	0.202
	Ch 11	-6.35346	3.92756	-14.2063	4.1568	-6.29759	1.84043	-7.51946	3.02506	0.971	0.337	0.049	1.589	0.223	0.077	4.16	0.056	0.18
	Ch 12	0.0831769	4.24665	-10.1799	4.2408	-6.4844	2.22054	-4.74371	2.72635	0.029	0.866	0.002	2.063	0.167	0.098	9.155	0.007	0.325
	Ch 13	-3.34899	4.13386	-12.1074	4.41342	-5.18433	1.88906	-6.62198	2.01389	0.303	0.588	0.016	2.89	0.105	0.132	5.979	0.024	0.239
	Ch 14	8.79379	3.99013	-2.27558	2.60755	1.73527	1.88615	-1.83608	2.13381	1.395	0.252	0.068	7.823	0.012	0.292	3.841	0.065	0.168
	Ch 15	17.4185	5.27576	-0.303709	4.01765	6.31387	2.09293	3.99607	2.73652	0.984	0.334	0.049	9.105	0.007	0.324	6.938	0.016	0.267
	Ch 16	14.5189	6.72696	-1.81763	3.84931	4.04702	2.44035	-0.330107	2.33951	0.91	0.352	0.046	7.699	0.012	0.288	3.246	0.087	0.146
	Ch 17	12.6104	4.63872	-1.35696	3.33965	-1.95146	1.6548	-3.92341	2.4878	6.406	0.02	0.252	5.246	0.034	0.216	9.725	0.006	0.339
	Ch 18	12.3789	4.29521	-0.836378	3.20396	-6.83908	1.99195	-5.32015	3.3784	11.488	0.003	0.377	1.899	0.184	0.091	13.987	0.001	0.424
	Ch 19	20.3621	4.2019	2.71093	4.44441	-5.47872	2.32379	-4.87821	3.77309	23.368	0	0.552	3.295	0.085	0.148	16.3	0.001	0.462
	Ch 20	18.5062	4.32383	3.70761	3.4984	-5.78055	2.2228	-3.56261	2.20014	31.513	0	0.624	3.156	0.092	0.142	15.949	0.001	0.456
	Ch 21	12.0296	3.90921	2.42922	2.78811	-2.45684	1.87575	-0.915689	2.18489	11.191	0.003	0.371	1.659	0.213	0.08	10.326	0.005	0.352
	Ch 22	15.6776	5.83233	-4.10159	3.91891	3.34509	1.94471	-0.194933	2.8573	1.361	0.258	0.067	9.444	0.006	0.332	7.246	0.014	0.276
	df = (1, 19) was appreciable to each main effect (period or condition), and interaction (condition × period).
	aIn channel 4, n =18 and df = (1, 17) were appreciable.
	ANOVA: analysis of variance; SE: standard error.
