# Supplementary material for: Prefrontal activation while listening to a letter of gratitude read aloud by a coworker face-to-face: A NIRS study
Source: PLoS One. 2020 Sep 8;15(9):e0238715. doi: 10.1371/journal.pone.0238715 (PMC7478838; doi:10.1371/journal.pone.0238715)
Supplement: S3 Table — df = (1, 19) was appreciable to each main effect (period or condition), and interaction (condition × period). aIn channel 4, n = 18 and df = (1, 17) was appreciable. ANOVA: analysis of variance; SE: standard error. (XLSX) [file pone.0238715.s004.xlsx]

## Sheet: S3
	S3 Table. Changes in total-Hb (×10-3) and results of the two-way repeated measures ANOVA in each channel (n = 20).
		Listening period				Baseline period				Main effect of period			Main effect of conditon			Interaction (Period × Condition)
	NIRS-channels	Experimental condition		Control condition		Experimental condition		Control condition
		Mean	SE	Mean	SE	Mean	SE	Mean	SE	F	P-value	partial η2	F	P-value	partial η2	F	P-value	partial η2
	Ch 1	8.41652	6.25988	-0.586877	4.01721	1.51128	1.67891	-2.53311	1.92961	0.824	0.375	0.042	7.823	0.011	0.292	1.942	0.18	0.093
	Ch 2	8.00845	3.58509	0.228699	3.04702	-1.75227	1.40135	-6.87277	3.5723	7.645	0.012	0.287	3.843	0.065	0.168	0.55	0.467	0.028
	Ch 3	-2.06278	4.99594	-4.78159	4.10019	-3.75762	1.47404	-3.85339	3.01573	0.008	0.932	0	0.246	0.625	0.013	1.027	0.324	0.051
	Ch 4a	9.20421	7.15409	3.87265	5.19847	0.143524	1.12825	1.28795	1.98411	1.29	0.271	0.071	0.585	0.455	0.033	2.65	0.122	0.135
	Ch 5	8.34889	3.97475	3.37705	3.78579	-2.48007	1.26503	-2.73602	2.75803	6.663	0.018	0.26	1.144	0.298	0.057	3.089	0.095	0.14
	Ch 6	4.86251	2.71443	-2.91304	2.57973	-0.614891	1.10814	-6.20641	2.5049	3.858	0.064	0.169	6.051	0.024	0.242	0.781	0.388	0.039
	Ch 7	8.93924	4.06768	-0.30762	3.63404	0.196065	1.05763	-2.63745	2.37008	2.453	0.134	0.114	4.786	0.041	0.201	2.437	0.135	0.114
	Ch 8	4.59245	6.22295	-6.95281	3.25784	1.12401	2.90473	-3.46722	2.64762	0	0.998	0	4.726	0.043	0.199	1.116	0.304	0.055
	Ch 9	8.56743	5.46604	-8.09382	4.06956	0.912159	1.68585	-6.00278	3.82788	0.506	0.486	0.026	8.166	0.01	0.301	5.172	0.035	0.214
	Ch 10	-14.7445	7.28696	-22.0455	5.92325	-5.99933	1.57726	-8.39764	3.81343	3.716	0.069	0.164	1.378	0.255	0.068	1.854	0.189	0.089
	Ch 11	-21.0968	6.73424	-24.842	6.14027	-6.42255	1.82139	-7.50172	3.35105	7.269	0.014	0.277	0.32	0.578	0.017	0.486	0.494	0.025
	Ch 12	-7.06558	5.45381	-16.5465	5.72592	-6.48941	1.97161	-5.91455	2.82711	1.338	0.262	0.066	2.019	0.172	0.096	6.042	0.024	0.241
	Ch 13	-12.2021	6.54316	-20.3814	6.53642	-4.86588	1.92696	-7.45566	2.2623	3.323	0.084	0.149	2.79	0.111	0.128	2.996	0.1	0.136
	Ch 14	2.2349	3.39467	-8.66106	2.67209	0.725938	1.1523	-3.59384	2.88302	0.425	0.522	0.022	7.675	0.012	0.288	3.387	0.081	0.151
	Ch 15	6.92303	4.72518	-4.89117	3.65257	-1.06577	1.65871	-1.59825	2.63805	0.468	0.502	0.024	5.846	0.026	0.235	5.796	0.026	0.234
	Ch 16	14.263	8.24616	-3.63958	4.73172	1.69521	2.33149	-4.04914	3.05865	1.15	0.297	0.057	7.209	0.015	0.275	3.061	0.096	0.139
	Ch 17	13.1148	5.85807	-2.74397	4.4224	-0.778434	1.90919	-4.23513	3.05343	3.047	0.097	0.138	5.765	0.027	0.233	10.065	0.005	0.346
	Ch 18	12.9142	5.21052	0.815895	3.93657	-5.48801	2.17079	-6.22515	3.68511	7.169	0.015	0.274	1.84	0.191	0.088	8.061	0.01	0.298
	Ch 19	27.8469	5.3084	7.58347	6.17212	-4.12978	2.26617	-6.28832	4.22597	27.731	0	0.593	3.942	0.062	0.172	9.538	0.006	0.334
	Ch 20	23.5402	5.6756	7.6289	4.77233	-5.48626	2.52836	-4.29539	2.63101	27.677	0	0.593	3.285	0.086	0.147	12.301	0.002	0.393
	Ch 21	11.6259	4.73365	2.15303	3.37705	-2.40824	1.69404	-0.592936	2.51856	6.281	0.021	0.248	1.357	0.259	0.067	8.596	0.009	0.311
	Ch 22	11.2309	5.75892	-7.67852	3.53794	-0.379034	1.50709	-3.75993	3.64948	1.084	0.311	0.054	6.251	0.022	0.248	7.871	0.011	0.293
	df = (1, 19) was appreciable to each main effect (period or condition), and interaction (condition × period).
	aIn channel 4, n =18 and df = (1, 17) were appreciable.
	ANOVA: analysis of variance; SE: standard error.
